# Supplementary material
Source: PubMed Central journal article supplement (PMC4533222)
Supplement: peds.2014-3825_peds.2014-3825SupplementaryData.pdf [file peds.2014-3825_peds.2014-3825SupplementaryData.pdf]

## Supplemental Information

**SUPPLEMENTAL TABLE 4** International Cardiac Collaborative on Neurodevelopment (ICCON) Centers and Investigators

---

|                                                                                   |
|-----------------------------------------------------------------------------------|
| Alfred I. Dupont Hospital for Children <sup>a,b</sup>                             |
| Christian Pizarro                                                                 |
| Erica Sood                                                                        |
| Boston Children's Hospital <sup>a,c</sup>                                         |
| David C. Bellinger                                                                |
| Carolyn Dunbar-Masterson                                                          |
| Richard A. Jonas                                                                  |
| Jane W. Newburger                                                                 |
| Christian Stopp                                                                   |
| David Wypij                                                                       |
| Children's Healthcare of Atlanta <sup>a,b</sup>                                   |
| Dawn Ilardi                                                                       |
| William T. Mahle                                                                  |
| Children's Hospital Los Angeles <sup>a</sup>                                      |
| Alan B. Lewis                                                                     |
| Nancy A. Pike                                                                     |
| Children's Hospital of Philadelphia <sup>a</sup>                                  |
| Judy Bernbaum                                                                     |
| Robert R. Clancy                                                                  |
| J. William Gaynor                                                                 |
| Marsha Gerdes                                                                     |
| Gil Wernovsky                                                                     |
| Elaine H. Zackai                                                                  |
| Children's Hospital and Medical Center, Omaha <sup>a,b</sup>                      |
| Carman DeMare                                                                     |
| Kim Duncan                                                                        |
| Howard Needelman                                                                  |
| Children's National Medical Center <sup>a</sup>                                   |
| Mary T. Donofrio                                                                  |
| Penny Glass                                                                       |
| Richard A. Jonas                                                                  |
| Kami B. Skurow-Todd                                                               |
| Cincinnati Children's Hospital Medical Center <sup>a</sup>                        |
| Duke University Medical Center <sup>a</sup>                                       |
| Jennifer S. Li                                                                    |
| The Hospital for Sick Children, Toronto <sup>a</sup>                              |
| Johns Hopkins All Children's Heart Institute <sup>a</sup>                         |
| Jeffrey P. Jacobs                                                                 |
| Medical College of Wisconsin <sup>a,b</sup>                                       |
| Cheryl L. Brosig                                                                  |
| Nancy S. Ghanayem                                                                 |
| Kathleen A. Mussatto                                                              |
| Medical University of South Carolina <sup>a</sup>                                 |
| Andrew M. Atz                                                                     |
| Mott's Children's Hospital <sup>a</sup>                                           |
| Caren S. Goldberg                                                                 |
| Richard G. Ohye                                                                   |
| Pediatric Heart Network                                                           |
| Gail Pearson                                                                      |
| Victoria L. Pemberton                                                             |
| New York-Presbyterian Morgan Stanley Children's Hospital of New York <sup>a</sup> |
| Ismee Williams                                                                    |
| Primary Children's Medical Center <sup>a</sup>                                    |
| Shaji C. Menon                                                                    |
| Royal Children's Hospital, Melbourne <sup>b</sup>                                 |
| Julia Gunn                                                                        |
| Lara S. Shekerdeman                                                               |
| Michelle Goldsworthy, RN                                                          |

---

**SUPPLEMENTAL TABLE 4** Continued

---

Starship Children's Hospital, Auckland<sup>b</sup>

John Beca

Stollery Children's Hospital and the Western Canadian Complex Pediatric Therapies Follow-up Program<sup>a,b</sup>

Joseph Atallah

Ivan M. Rebeyka

Charlene M.T. Robertson

Texas Children's Hospital<sup>b</sup>

Dean B. Andropoulos

Marie Turcich

Robert Voigt

Toyama University Hospital<sup>a,b</sup>

Keijiro Ibuki

Fukiko Ichida

Mie Matsui

Tachiyo Matsuzaki Kakimoto

Naoki Yoshimura

University Children's Hospital, Zurich<sup>a</sup>

Ingrid Beck

Walter Knirsch

Beatrice Latal

University of British Columbia, Vancouver<sup>a</sup>

Anne Synnes

University of California, San Francisco<sup>a,b</sup>

Patrick S. McQuillen

Steven P. Miller

University of Queensland, Brisbane<sup>a</sup>

P.B. Colditz

Robert Justo

D.R. Robertson

University of Texas Southwestern Medical Center<sup>a</sup>

University Hospital, Aachen

Hedwig Hövels-Gürich

---

<sup>a</sup> BSID, second edition.

<sup>b</sup> Bayley Scales of Infant and Toddler Development, third edition.

<sup>c</sup> BSID, first edition.

**SUPPLEMENTAL TABLE 5** Patient and Demographic Factors

| Variable                                             | Definition                                                                                                                                                                                                                                                                                                                                                                                                                                                                                                                                                                                                                                                                                                             |
|------------------------------------------------------|------------------------------------------------------------------------------------------------------------------------------------------------------------------------------------------------------------------------------------------------------------------------------------------------------------------------------------------------------------------------------------------------------------------------------------------------------------------------------------------------------------------------------------------------------------------------------------------------------------------------------------------------------------------------------------------------------------------------|
| Cardiac class                                        | Class I: Two ventricle/no arch obstruction<br>Class II: Two ventricle/arch obstruction<br>Class III: Single ventricle/no arch obstruction<br>Class IV: Single ventricle/arch obstruction                                                                                                                                                                                                                                                                                                                                                                                                                                                                                                                               |
| Cardiac diagnosis                                    | d-Transposition of the great arteries with intact ventricular septum<br>d-Transposition of the great arteries with ventricular septal defect<br>Tetralogy of Fallot<br>Tetralogy of Fallot with pulmonary atresia<br>Truncus arteriosus<br>Total anomalous pulmonary venous connection<br>Ventricular septal defect without interrupted aortic arch and coarctation<br>Ventricular septal defect with interrupted aortic arch and coarctation<br>Coarctation and arch hypoplasia<br>Atrioventricular canal defects (partial, transitional, or complete)<br>Pulmonary atresia with intact ventricular septum<br>Hypoplastic left heart syndrome<br>Other functional single ventricle anomaly<br>Other cardiac diagnosis |
| Year of birth                                        |                                                                                                                                                                                                                                                                                                                                                                                                                                                                                                                                                                                                                                                                                                                        |
| Birth weight                                         | Kilograms                                                                                                                                                                                                                                                                                                                                                                                                                                                                                                                                                                                                                                                                                                              |
| Gestational age                                      | Weeks                                                                                                                                                                                                                                                                                                                                                                                                                                                                                                                                                                                                                                                                                                                  |
| Race                                                 | White<br>Black/African American<br>Other                                                                                                                                                                                                                                                                                                                                                                                                                                                                                                                                                                                                                                                                               |
| Ethnicity                                            | Hispanic/Non-Hispanic                                                                                                                                                                                                                                                                                                                                                                                                                                                                                                                                                                                                                                                                                                  |
| Gender                                               | Female/male                                                                                                                                                                                                                                                                                                                                                                                                                                                                                                                                                                                                                                                                                                            |
| Maternal education                                   | Graduate school<br>Completed college<br>High school and/or some college<br>Less than high school<br>Missing or not specified                                                                                                                                                                                                                                                                                                                                                                                                                                                                                                                                                                                           |
| Genetic or nongenetic anomaly                        | Normal or anomaly not specified<br>Suspected genetic or nongenetic anomaly<br>Definite genetic anomaly                                                                                                                                                                                                                                                                                                                                                                                                                                                                                                                                                                                                                 |
| Description of genetic or major extracardiac anomaly | Alagille syndrome<br>CHARGE (coloboma, heart defect, atresia choanae, retarded growth and development, genital abnormality, and ear abnormality)<br>22q11 deletions<br>Goldenhar syndrome<br>Holt–Oram syndrome<br>Jacobsen syndrome<br>Kabuki syndrome<br>Noonan's syndrome<br>Trisomy 13<br>Trisomy 18<br>Trisomy 21<br>Turner's syndrome<br>VATER/VACTERL (vertebrae, imperforate anus or anal atresia, cardiac anomalies, tracheoesophageal fistula, renal anomalies, limb anomalies)<br>Williams syndrome<br>Multiple congenital anomalies, not otherwise specified<br>Fetal alcohol spectrum disorder<br>Abnormality of genetic testing not otherwise specified<br>Other genetic or major extracardiac anomaly   |
| Prenatal diagnosis                                   | Yes/no                                                                                                                                                                                                                                                                                                                                                                                                                                                                                                                                                                                                                                                                                                                 |
| Preoperative mechanical ventilation                  | Yes/no, if on mechanical ventilation when taken to operating room for surgery                                                                                                                                                                                                                                                                                                                                                                                                                                                                                                                                                                                                                                          |
